# Supplementary material for: Cellular response to small molecules that selectively stall protein synthesis by the ribosome
Source: PLoS Genet. 2019 Mar 15;15(3):e1008057. doi: 10.1371/journal.pgen.1008057 (PMC6436758; doi:10.1371/journal.pgen.1008057)
Supplement: S6 Table — (XLSX) [file pgen.1008057.s018.xlsx]

## Sheet: Sheet1
Antibody	Source	Cat. no
Rabbit anti-Alyref	Bethyl Laboratories	A302-892A
Rabbit anti-ASCC1	Bethyl Laboratories	A303-871A
Rabbit anti-ASCC2	Bethyl Laboratories	A304-020A
Rabbit anti-ASCC3 (WB)	Bethyl Laboratories	A304-014A
Rabbit anti-ASCC3 (IP)	Bethyl Laboratories	A304-015A
Rabbit anti-EDD1 (UBR5)	Bethyl Laboratories	A303-045A
Rabbit anti-GAPDH	Bethyl Laboratories	A300-639A
Rabbit anti-HBS1L	Bethyl Laboratories	A305-362A
Rabbit anti-PELO	Abcam	Ab154-335
Rabbit anti-NEMF	Sigma-Aldrich	SAB4300865
Rabbit anti-RPL27	Bethyl Laboratories	A305-033A
Rabbit anti-RPS3	Bethyl Laboratories	A303-841A
Rabbit anti-RPS19	Bethyl Laboratories	A304-002A
Donkey anti-rabbit-HRP	GE Healthcare	NA934V
